# Supplementary material for: Rapid Gardos Hereditary Xerocytosis Diagnosis in 8 Families Using Reticulocyte Indices
Source: PubMed Central journal article supplement (PMC7841495; doi:10.3389/fphys.2020.602109), 2021-01-14
Supplement: Table_1.pdf [file Table_1.pdf]

**Supplemental Table 1:** Characteristics of 15 Gardos-HX cases at diagnosis. (Y yes, n no, OGE: osmolar gradient ektacytometry , N Normal, A atypical). \* undescribed cases

| Family - member            | Normal range                       | 1-1               | 1-2  | 1-3  | 2-1         | 3-1         | 3-2  | 4-1  | 4-2  | 5-1  | 6-1  | 6-2   | 6-3  | 7-1*  | 7-2* | 8-1* |
|----------------------------|------------------------------------|-------------------|------|------|-------------|-------------|------|------|------|------|------|-------|------|-------|------|------|
| <b>Mutation</b>            |                                    | c.1109_1119+17del |      |      | p.Ala322Val | p.Arg352His |      |      |      |      |      |       |      |       |      |      |
| <b>Age</b>                 |                                    | 59                | 27   | 25   | 37          | 26          | 1    | 47   | 4    | 16   | 2    | 36    | 33   | 24    | 58   | 33   |
| <b>Sex</b>                 |                                    | M                 | F    | M    | M           | F           | M    | M    | F    | M    | M    | F     | F    | M     | M    | M    |
| <b>Splenomegaly</b>        |                                    | -                 | -    | Y    | -           | Y           | n    | Y    | n    | n    | Y    | -     | -    | -     | -    | Y    |
| <b>Splenectomy</b>         |                                    | Y                 | Y    | n    | Y           | n           | n    | n    | n    | n    | n    | Y     | Y    | Y     | Y    | n    |
| <b>Cholelithiasis</b>      |                                    | Y                 | Y    | Y    | Y           | Y           | n    | Y    | n    | n    | n    | Y     | Y    | nd    | nd   | n    |
| <b>Iron overload</b>       |                                    | Y                 | Y    | nd   | Y           | n           | n    | Y    | Y    | n    | n    | Y     | Y    | Y     | Y    | Y    |
| <b>Iron chelation</b>      |                                    | Y                 | n    | nd   | Y           | n           | n    | Y    | n    | n    | n    | Y     | Y    | Y     | Y    | n    |
| <b>Transfusions</b>        |                                    | n                 | n    | n    | Y           | n           | n    | n    | Y    | n    | Y    | Y     | Y    | n     | n    | n    |
| <b>Hb level (g/L)</b>      | 120-160 (female)<br>130-180 (male) | 82                | 91   | 108  | 86          | 124         | 94   | 120  | 95   | 122  | 97   | 82    | 94   | 97    | 118  | 133  |
| <b>MCV (fL)</b>            | 80-100                             | 103               | 102  | 91   | 106         | 96          | 88   | 95   | 87.5 | 91   | 87   | 112   | 105  | 117   | 105  | 102  |
| <b>MCHC (g/L)</b>          | 310-360                            | 324               | 304  | 321  | 331         | 347         | 351  | 333  | 344  | 320  | 347  | 332   | 317  | 338   | 346  | 331  |
| <b>Reticulocytes (G/L)</b> | 20-120                             | 192.5             | 162  | 118  | 500         | 96          | 250  | 119  | 208  | 75   | 255  | 221   | 248  | 346   | 721  | 254  |
| <b>rMCV (fL)</b>           | 92-120                             | 92.1              | 94.5 | 95.4 | 95.8        | 92.9        | 86.5 | 97.4 | 88.3 | 98.5 | 90.2 | 107.4 | 92.4 | 103.6 | 91.8 | 99.9 |
| <b>rMCHC (g/L)</b>         | 270-330                            | 380               | 336  | 338  | 364         | 396         | 370  | 364  | 390  | 322  | 366  | 368   | 376  | 379   | 399  | 365  |
| <b>Δ MCV (fL)</b>          | -                                  | -3.4              | -4.4 | 6.7  | -6.7        | 1.5         | -1.8 | 3.2  | 1    | 6.7  | 6.6  | -3.3  | -8.7 | -7.3  | -7.3 | 3.9  |
| <b>Δ MCHC (g/L)</b>        | -                                  | 36                | 33   | 14   | 17          | 13          | 29   | 11   | 11   | 0    | 4    | 14    | 25   | 39    | 37   | 0,1  |
| <b>OGE profile</b>         |                                    | N                 | N    | N    | A           | N           | A    | N    | A    | N    | N    | N     | N    | A     | A    | N    |
